# Supplementary material for: Characterization of Collagens Fibers (I, III, IV) and Elastin in the Extracellular Matrix of Normal and Neoplastic Canine Prostate
Source: Preprints.org preprint supplement (doi:10.20944/preprints201901.0082.v1), 2019-01-09
Supplement: Supplementary file 1 [file supplementary]

| **Supplementary Table S1**. Samples used for PSR and IHC test. | | | |
| --- | --- | --- | --- |
| Case number | Diagnosis | PSR | IHC |
| 1 | Normal | X | X |
| 2 | Normal | X | X |
| 3 | Normal | X | X |
| 4 | Normal | X | X |
| 5 | Normal | X | X |
| 6 | Normal | X | X |
| 7 | Normal | X | X |
| 8 | Normal | X | X |
| 9 | PC | X | X |
| 10 | PC | X | X |
| 11 | PC | X | X |
| 12 | PC | X | X |
| 13 | PC | X | X |
| 14 | PC | X | X |
| 15 | PC | X | X |
| 16 | PC | X | X |
| 17 | PC | X | X |
| 18 | PC | X | X |
|  |  |  |  |
